# Supplementary material for: Economic sustainability of tambatinga (Colossoma × Piaractus) farming in tropical earthen ponds: insights from small-scale aquaculture in Brazil
Source: Research Square preprint supplement (doi:10.21203/rs.3.rs-7661118/v1), 2025-11-19
Supplement: Supplementary file 1 [file 5b827d082542b22a694928a0.docx]

**Supplementary information (SI)**

**Figure S1. Accumulated rainfall between 2021 and 2025 in Alta Floresta, Mato Grosso, Brazil**

**Source: Adapted from climate data from UNEMAT 2025, Mato Grosso State University, Alta Floresta/MT Campus. T: accumulated total for the year (mm)**

**Table S1.** Data on the equipment used in the tambatinga production project, carried out in earthen ponds in the municipality of Alta Floresta, MT

| Equipment description | Trademark | Design | State/Country of manufacture |
| --- | --- | --- | --- |
| Mixer | Cremasco | MRC500 | SP/Brazil |
| Conveyor screw | Scarpolli Tornearia |  | MT/Brazil |
| Motor pump | Branco Motores | B4T705L | Brazil |
| Water tank | Fortlev | 1000 l | Brazil |
| Boat | Barcos Mogi Mirim | Mirim 500 | SP/Brazil |
| Aerator | Agricotec | AGTCB100 | SC/Brazil |
| Pelletizer | Chavante | 7.5 CV | SP/Brazil |
| Motorcycle | Honda | CG 125/Titan | Brazil |
| Treatment machine | Scarpolli Tornearia |  | MT/Brazil |
| Tractor | John Deere | 6600 | Brazil |

Caption: SP: São Paulo, MT: Mato Grosso, SC: Santa Catarina.

**Table S2.** Cash flow of cycle 1 (Oct 2022 to Sep 2023) related to tambatinga production in earthen ponds in Alta Floresta, Mato Grosso, Brazil

|  | Year 0 | Year 1 | Year 2 | Year 3 | Year 4 | Year 5 |
| --- | --- | --- | --- | --- | --- | --- |
| ................................................... R$ BRL.............................................. | | | | | | |
| Investment | - 52,100.00 |  |  |  |  |  |
| Operating revenue |  | 516,159.48 | 541,967.45 | 569,065.83 | 597,519.12 | 627,395.07 |
| Fixed costs |  | 31,442.43 | 33,014.55 | 34,665.28 | 36,398.54 | 38,218.47 |
| Variable costs |  | 247,092.71 | 259,447.34 | 272,419.71 | 286,040.69 | 300,342.73 |
| Total costs |  | 278,535.13 | 292,461.89 | 307,084.98 | 322,439.23 | 338,561.20 |
| Gross operating profit |  | 237,624.35 | 249,505.56 | 261,980.84 | 275,079.88 | 288,833.88 |
| Depreciation |  | 6,046.39 | 6,046.39 | 6,046.39 | 6,046.39 | 6,046.39 |
| Taxable profit |  | 231,577.96 | 243,459.18 | 255,934.46 | 269,033.50 | 282,787.49 |
| Income tax |  | 63,683.94 | 66,951.27 | 70,381.98 | 73,984.21 | 77,766.56 |
| Net profit |  | 167,894.02 | 176,507.90 | 185,552.48 | 195,049.29 | 205,020.93 |
| Depreciation |  | 6,046.39 | 6,046.39 | 6,046.39 | 6,046.39 | 6,046.39 |
| Cash flow |  | 173,940.41 | 182,554.29 | 191,598.87 | 201,095.67 | 211,067.32 |

**Table S3.** Cash flow of cycle 2 (Oct 2022 to Sep 2023) related to tambatinga production in earthen ponds in Alta Floresta, Mato Grosso, Brazil

|  | Year 0 | Year 1 | Year 2 | Year 3 | Year 4 | Year 5 |
| --- | --- | --- | --- | --- | --- | --- |
| ................................................... R$ BRL.............................................. | | | | | | |
| Investment* | - 50,780.00 |  |  |  |  |  |
| Operating revenue |  | 326,157.20 | 342,465.06 | 359,588.31 | 377,588.31 | 396,446.12 |
| Fixed costs |  | 20,782.34 | 21,821.46 | 22,912.53 | 24,058.16 | 25,261.07 |
| Variable costs |  | 140,517.72 | 147,543.61 | 154,920.79 | 162,666.83 | 170,800.17 |
| Total costs |  | 161,300.06 | 169,365.07 | 177,833.32 | 186,724.99 | 196,061.24 |
| Gross operating profit |  | 164,857.14 | 173,099.99 | 181,754.99 | 190,842.74 | 200,384.88 |
| Depreciation |  | 5,808.79 | 5,808.79 | 5,808.79 | 5,808.79 | 5,808.79 |
| Taxable profit |  | 159,048.35 | 167,291.21 | 175,946.21 | 185,033.96 | 194,576.09 |
| Income tax |  | 43,738.30 | 46,005.08 | 48,385.21 | 50,884.34 | 53,508.43 |
| Net profit |  | 115,310.05 | 121,286.13 | 127,561.00 | 134,149.62 | 141,067.67 |
| Depreciation |  | 5,808.79 | 5,808.79 | 5,808.79 | 5,808.79 | 5,808.79 |
| Cash flow |  | 121,118.84 | 127,094.91 | 133,369.79 | 139,958.40 | 146,876.45 |

Source: Original research results. *Depreciation of the aerator is deducted from the investment.

**Table S4.** Cash flow under the lowest production and pricing scenario for tambatinga farming in earthen ponds in Alta Floresta, Mato Grosso, Brazil

|  | Year 0 | Year 1 | Year 2 | Year 3 | Year 4 | Year 5 |
| --- | --- | --- | --- | --- | --- | --- |
| ................................................... R$ BRL.............................................. | | | | | | |
| Investment | - 52,100.00 |  |  |  |  |  |
| Operating revenue |  | 229,325.88 | 240,792.17 | 252,831.78 | 265,473.37 | 278,747.04 |
| Fixed costs |  | 25,353.62 | 26,621.31 | 27,952.37 | 29,349.99 | 30,817.49 |
| Variable costs |  | 142,977.72 | 150,126.61 | 157,632.94 | 165,514.58 | 173,790.31 |
| Total costs |  | 168,331.34 | 176,747.91 | 185,585.31 | 194,864.57 | 204,607.80 |
| Gross operating profit |  | 60,994.54 | 64,044.26 | 67,246.48 | 70,608.80 | 74,139.24 |
| Depreciation |  | 5,808.79 | 5,808.79 | 5,808.79 | 5,808.79 | 5,808.79 |
| Taxable profit |  | 55,185.75 | 58,235.48 | 61,437.69 | 64,800.01 | 68,330.45 |
| Income tax |  | 15,176.08 | 16,014.76 | 16,895.36 | 17,820.00 | 18,790.87 |
| Net profit |  | 40,009.67 | 42,220.72 | 44,542.33 | 46,980.01 | 49,539.58 |
| Depreciation |  | 5,808.79 | 5,808.79 | 5,808.79 | 5,808.79 | 5,808.79 |
| Cash flow |  | 45,818.45 | 48,029.51 | 50,351.11 | 52,788.80 | 55,348.36 |

Source: Original research results.

**Table S5.** Cash flow under the highest production and pricing scenario for tambatinga farming in earthen ponds in the municipality of Alta Floresta, Mato Grosso, Brazil

|  | Year 0 | Year 1 | Year 2 | Year 3 | Year 4 | Year 5 |
| --- | --- | --- | --- | --- | --- | --- |
| ................................................... R$ BRL.............................................. | | | | | | |
| Investment | - 52,100.00 |  |  |  |  |  |
| Operating revenue |  | 471,168.36 | 494,726.78 | 519,463.12 | 545,436.27 | 572,708.09 |
| Fixed costs |  | 23,027.62 | 24,179.00 | 25,387.95 | 26,657.34 | 27,990.21 |
| Variable costs |  | 142,977.72 | 150,126.61 | 157,632.94 | 165,514.58 | 173,790.31 |
| Total costs |  | 166,005.34 | 174,305.60 | 183,020.88 | 192,171.93 | 201,780.52 |
| Gross operating profit |  | 305,163.02 | 320,421.18 | 336,442.23 | 353,264.35 | 370,927.56 |
| Depreciation |  | 5,808.79 | 5,808.79 | 5,808.79 | 5,808.79 | 5,808.79 |
| Taxable profit |  | 299,354.24 | 314,612.39 | 330,633.45 | 347,455.56 | 365,118.78 |
| Income tax |  | 82,322.42 | 86,518.41 | 90,924.20 | 95,550.28 | 100,407.66 |
| Net profit |  | 217,031.82 | 228,093.98 | 239,709.25 | 251,905.28 | 264,711.11 |
| Depreciation |  | 5,808.79 | 5,808.79 | 5,808.79 | 5,808.79 | 5,808.79 |
| Cash flow |  | 222,840.61 | 233,902.77 | 245,518.04 | 257,714.07 | 270,519.90 |
